# Supplementary material for: Bactericidal activity of quercetin like-compounds isolated from Dendrophthoe pentandra leaves against Salmonella spp. and Escherichia coli: an in vitro experimental study
Source: Research Square preprint supplement (doi:10.21203/rs.3.rs-8723177/v1), 2026-02-13
Supplement: Supplementary file 1 [file 0d3e7090650accc64852807e.docx]

Additional file 1. Antibacterial activity of kanamycin and clavamox against *Salmonella* spp. and *Escherichia coli*

| Concentration  (μg/mL) | Positive control | | | | | | | | | | | | | | | | | | | |
| --- | --- | --- | --- | --- | --- | --- | --- | --- | --- | --- | --- | --- | --- | --- | --- | --- | --- | --- | --- | --- |
| Kanamycin | | | | | | | | | | Clavamox | | | | | | | | | |
| Total colonies of *Salmonella* spp. | | | | | Total colonies of *E. coli* | | | | | Total colonies of *Salmonella* spp. | | | | | Total colonies of *E. coli* | | | | |
| 1st | 2nd | 3rd | 4th | 5th | 1st | 2nd | 3rd | 4th | 5th | 1st | 2nd | 3rd | 4th | 5th | 1st | 2nd | 3rd | 4th | 5th |
| 156.25 | 300 | 300 | 300 | 300 | 300 | 300 | 300 | 300 | 300 | 300 | 300 | 300 | 300 | 300 | 300 | 300 | 300 | 300 | 300 | 300 |
| 312.5 | 47 | 39 | 43 | 38 | 45 | 300 | 300 | 300 | 300 | 300 | 2 | 3 | 3 | 2 | 2 | 300 | 300 | 300 | 300 | 300 |
| 625 | 2 | 3 | 2 | 2 | 2 | 300 | 300 | 300 | 300 | 300 | 1 | 1 | 1 | 1 | 0 | 20 | 10 | 10 | 8 | 5 |
| 1.250 | 2 | 2 | 2 | 1 | 1 | 32 | 27 | 26 | 31 | 29 | 0 | 0 | 0 | 0 | 0 | 2 | 1 | 1 | 1 | 1 |
| 2.500 | 0 | 0 | 0 | 0 | 0 | 11 | 8 | 9 | 9 | 11 | 0 | 0 | 0 | 0 | 0 | 0 | 0 | 0 | 0 | 0 |
| 5.000 | 0 | 0 | 0 | 0 | 0 | 4 | 4 | 3 | 3 | 3 | 0 | 0 | 0 | 0 | 0 | 0 | 0 | 0 | 0 | 0 |
| 10.000 | 0 | 0 | 0 | 0 | 0 | 0 | 0 | 0 | 0 | 0 | 0 | 0 | 0 | 0 | 0 | 0 | 0 | 0 | 0 | 0 |
|  | | | | | | | | | | | |  | | | | | | | |

Note: The negative control using aqua pro injection against both colony bacteria was still available.
