# Supplementary material for: Bactericidal activity of quercetin like-compounds isolated from Dendrophthoe pentandra leaves against Salmonella spp. and Escherichia coli: an in vitro experimental study
Source: Research Square preprint supplement (doi:10.21203/rs.3.rs-8723177/v1), 2026-02-13
Supplement: Supplementary file 2 [file 0f9a770ec9d82cb608d7a014.docx]

Additional file 3. Bactericidal activity of quercetin-like compounds versus kanamycin and clavamox against *Salmonella* spp. and *Escherichia coli*

| Groups | Antibiotics | Observed inhibition on 5 agar plates | | P |
| --- | --- | --- | --- | --- |
| Colonies of *Salmonella* spp. | Colonies *Escherichia coli* |
| Analytes | Quercetin-like Compounds | 4 | 0 | <0.05 |
| Positive Control | Kanamycin | 4 | 4 |
| Clavamox | 4 | 4 |
| Negative Control | Aqua pro injection | 0 | 0 |
