# Supplementary material for: Bactericidal activity of quercetin like-compounds isolated from Dendrophthoe pentandra leaves against Salmonella spp. and Escherichia coli: an in vitro experimental study
Source: Research Square preprint supplement (doi:10.21203/rs.3.rs-8723177/v1), 2026-02-13
Supplement: Supplementary file 3 [file d92224eabdf57265436bbee7.docx]

Additional file 2. Concentration of quercetin-like compounds and the corresponding inhibition of *Salmonella* spp. and *Escherichia coli* colonies

| Concentration  (μg/mL) | Quercetin-like compounds of extract mistletoe from *Lansium domesticum* (*Dendrophthoe pentandra* L. Miq) | | | | | | | | | |
| --- | --- | --- | --- | --- | --- | --- | --- | --- | --- | --- |
| Total colonies of *Salmonella* spp. | | | | | Total colonies of *Escherichia coli* | | | | |
| 1st | 2nd | 3rd | 4th | 5th | 1st | 2nd | 3rd | 4th | 5th |
| 625 | 300 | 291 | 125 | 15 | 6 | 300 | 300 | 300 | 300 | 300 |
| 1.250 | 300 | 290 | 149 | 12 | 0 | 300 | 300 | 300 | 300 | 300 |
| 2.500 | 300 | 292 | 154 | 9 | 0 | 300 | 300 | 300 | 300 | 300 |
| 5.000 | 300 | 292 | 158 | 12 | 0 | 300 | 300 | 300 | 300 | 300 |
| 10.000 | 300 | 291 | 144 | 7 | 0 | 300 | 300 | 300 | 300 | 300 |
